# Supplementary material for: In-field LAMP assay for rapid detection of human faecal contamination in environmental water
Source: Royal Society of Chemistry journal article supplement (doi:10.1039/d2ew00433j), 2022-01-01
Supplement: d2ew00433j1.pdf [file d2ew00433j1.pdf]

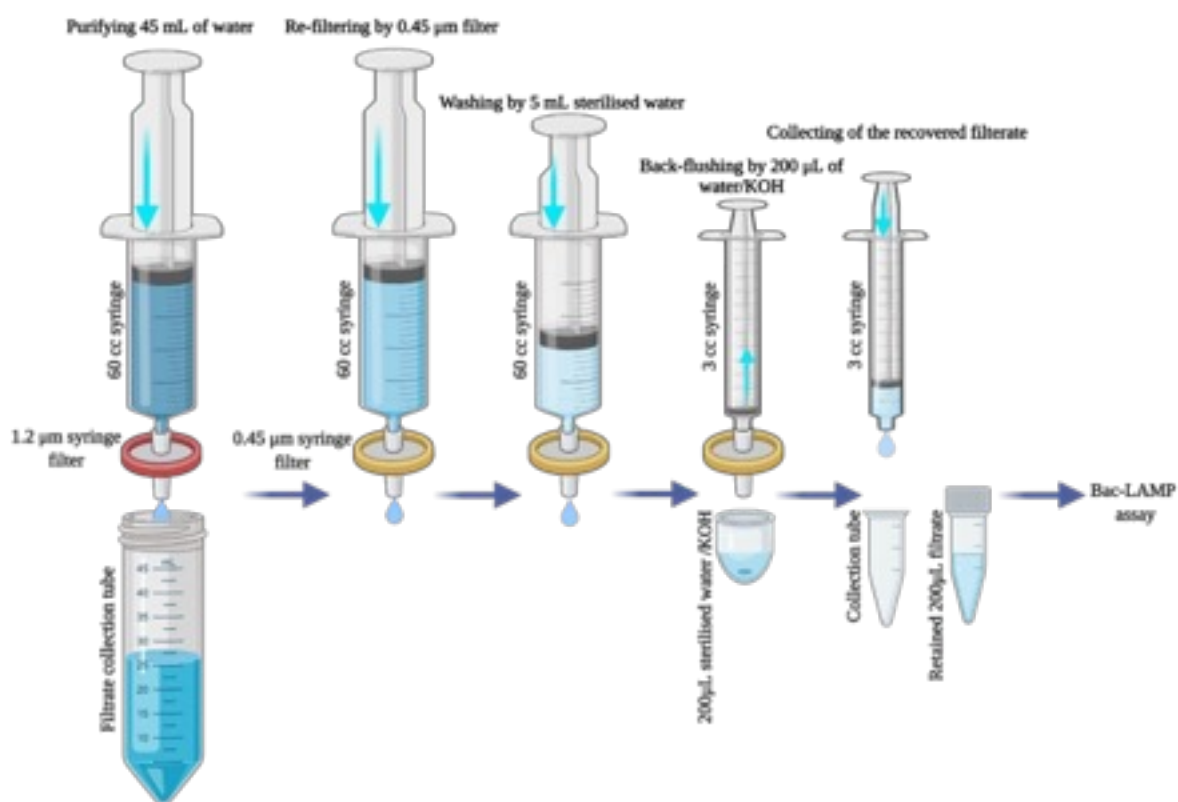

**Supplementary Figure 1.** Schematic illustration of in-field water sample filtration procedure

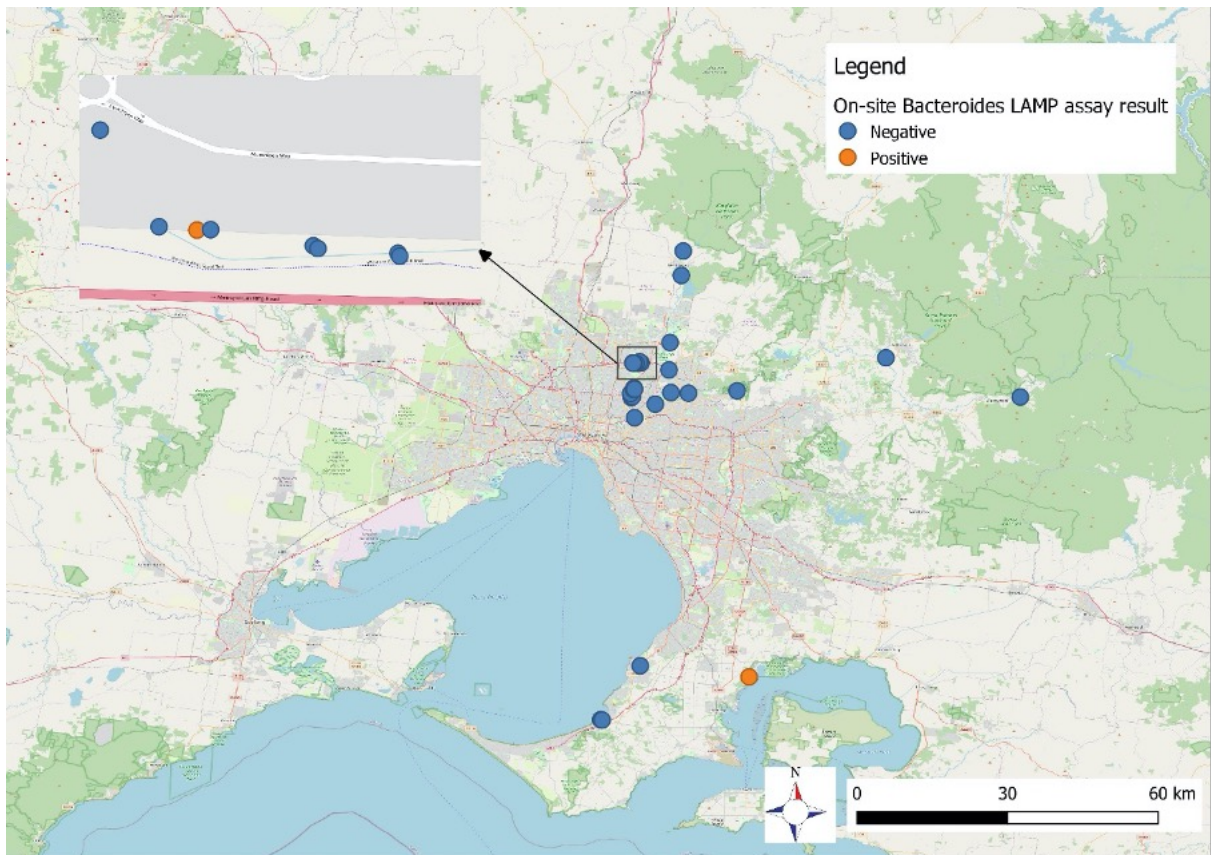

**Supplementary Figure 2.** *Bacteroides* LAMP assay testing location in Victoria, Australia

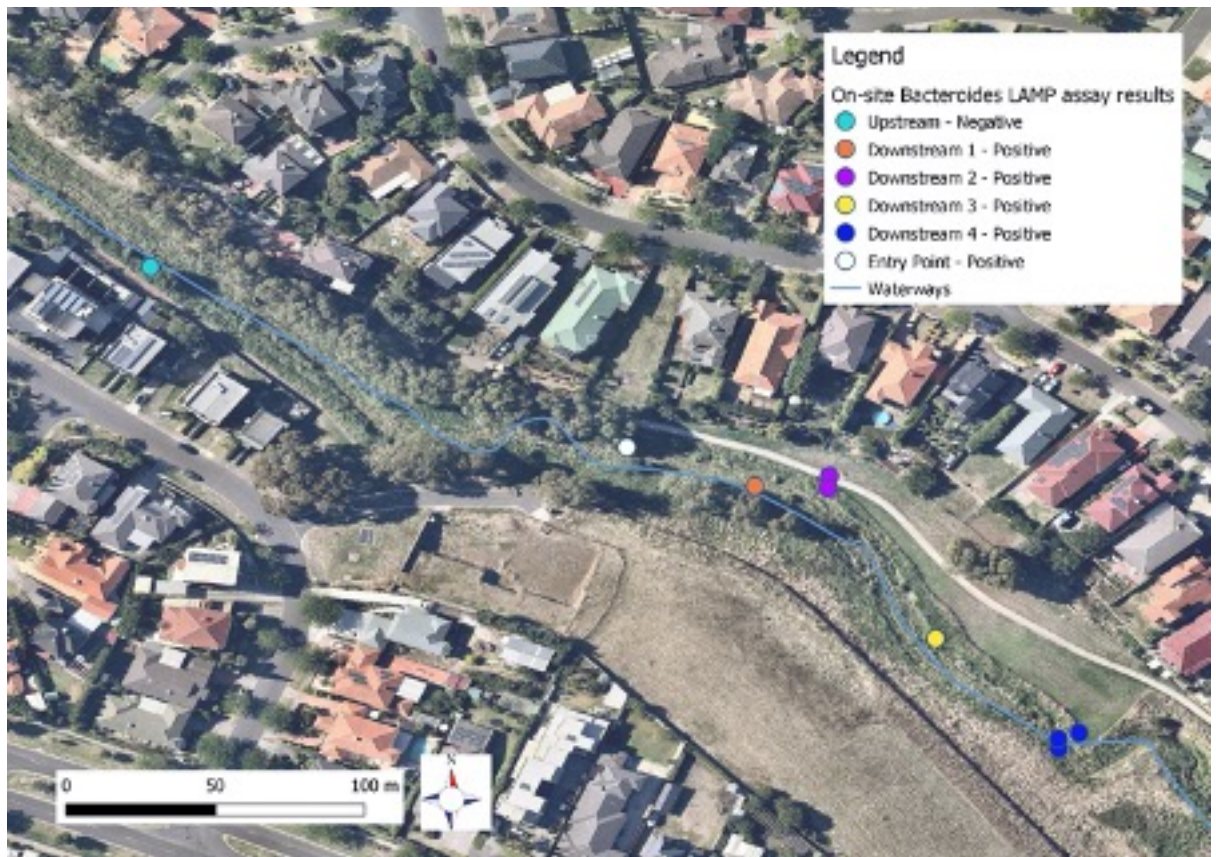

**Supplementary Figure 3.** Testing Location on Greenville Creek, Victoria, Australia
